# Supplementary material for: Control of bacterial cell wall autolysins by peptidoglycan crosslinking mode
Source: PubMed Central journal article supplement (PMC11390936; doi:10.1038/s41467-024-52325-2), 2024-09-11
Supplement: 41467_2024_52325_MOESM1_ESM.pdf [file 41467_2024_52325_MOESM1_ESM.pdf]

## SUPPLEMENTARY INFORMATION

### Control of bacterial cell wall autolysins by peptidoglycan crosslinking mode

Laura Alvarez<sup>1#</sup>, Sara B. Hernandez<sup>1,a#</sup>, Gabriel Torrens<sup>1</sup>, Anna I. Weaver<sup>2,3,b</sup>, Tobias Dörr<sup>2,3,4</sup> and Felipe Cava<sup>1,5,6,7,\*</sup>.

#### Affiliations:

<sup>1</sup>Department of Molecular Biology, Umeå University, Umeå, Sweden.

<sup>2</sup>Department of Microbiology, Cornell University, Ithaca, New York, USA.

<sup>3</sup>Weill Institute for Cell and Molecular Biology, Cornell University, Ithaca, New York, USA.

<sup>4</sup>Cornell Institute of Host-Microbe Interactions and Disease, Cornell University, Ithaca, New York, USA.

<sup>5</sup>Umeå Center for Microbial Research (UCMR), Umeå University, Umeå, Sweden.

<sup>6</sup>The Laboratory for Molecular Infection Medicine Sweden (MIMS), Umeå, Sweden.

<sup>7</sup>Science for Life Laboratory (SciLifeLab), Umeå University, Umeå, Sweden.

#### Current affiliation:

<sup>a</sup>Instituto de Bioquímica Vegetal y Fotosíntesis, Consejo Superior de Investigaciones Científicas and Universidad de Sevilla, Seville, Spain.

<sup>b</sup>Department of Microbiology, Blavatnik Institute, Harvard Medical School, Boston, MA, USA.

#These authors contributed equally.

\*For correspondence: [felipe.cava@umu.se](mailto:felipe.cava@umu.se)

**Lead contact:** Felipe Cava

**Running title:** Autolysin inhibition by peptidoglycan crosslinking

**Keywords:** cell wall, *Vibrio cholerae*, peptidoglycan, LD-crosslink, anhydromuropeptides, lytic transglycosylases

**Table of contents:**

- Supplementary Figures 1-12
- Supplementary Table 1: Bacterial strains
- Supplementary Table 2: Plasmids
- Supplementary Table 3: Oligonucleotides
- Supplementary Table 4. List of phage genomes and endolysins.
- Supplementary References

## Supplementary Figures

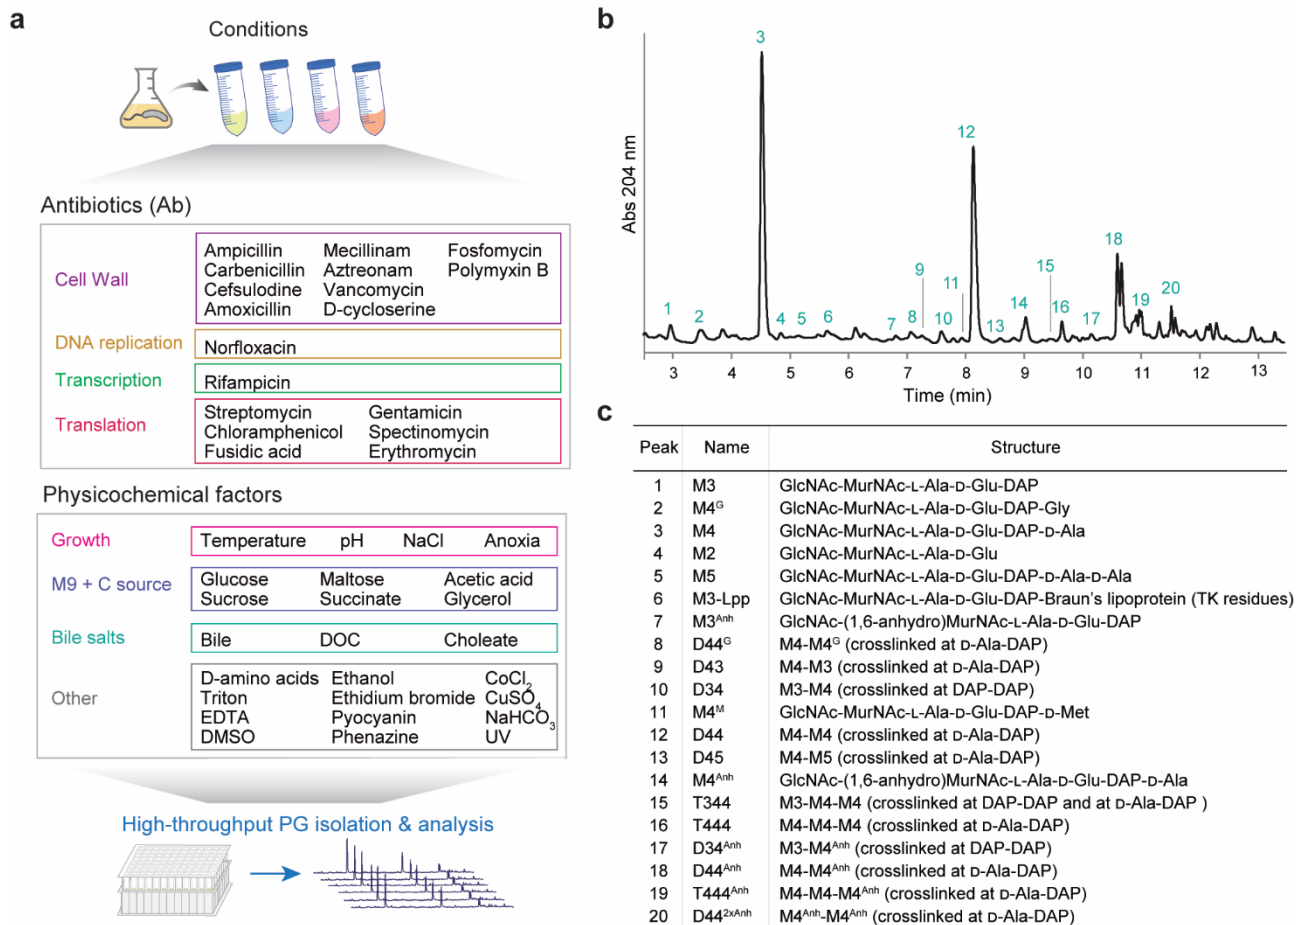

**Supplementary Figure 1. Screening of *V. cholerae*'s peptidoglycan plasticity across different conditions.** **a.** Wild type *V. cholerae* was exposed to sub-MIC concentrations of the indicated antibiotics or stress conditions (panels on the left). Several substances were tested at different concentrations such that a total of 110 different growth conditions were surveyed. Samples were processed for PG isolation and analysis using a filter-based high-throughput preparation method. **b.** Representative chromatogram of wild type *V. cholerae* strain. Identified peaks are listed. **c.** Table of muuropeptides identified in **b**, confirmed by mass spectrometry. GlcNAc: *N*-acetyl glucosamine; MurNAc: *N*-acetyl muramic acid; (1,6-anhydro)MurNAc: terminal 1,6-anhydro-*N*-acetyl muramic acid; L-Ala: L-alanine; D-Glu: D-glutamic acid; DAP: *meso* diaminopimelic acid; D-Ala: D-alanine; D-Met: D-methionine; Gly: glycine; Lpp: Braun's lipoprotein.

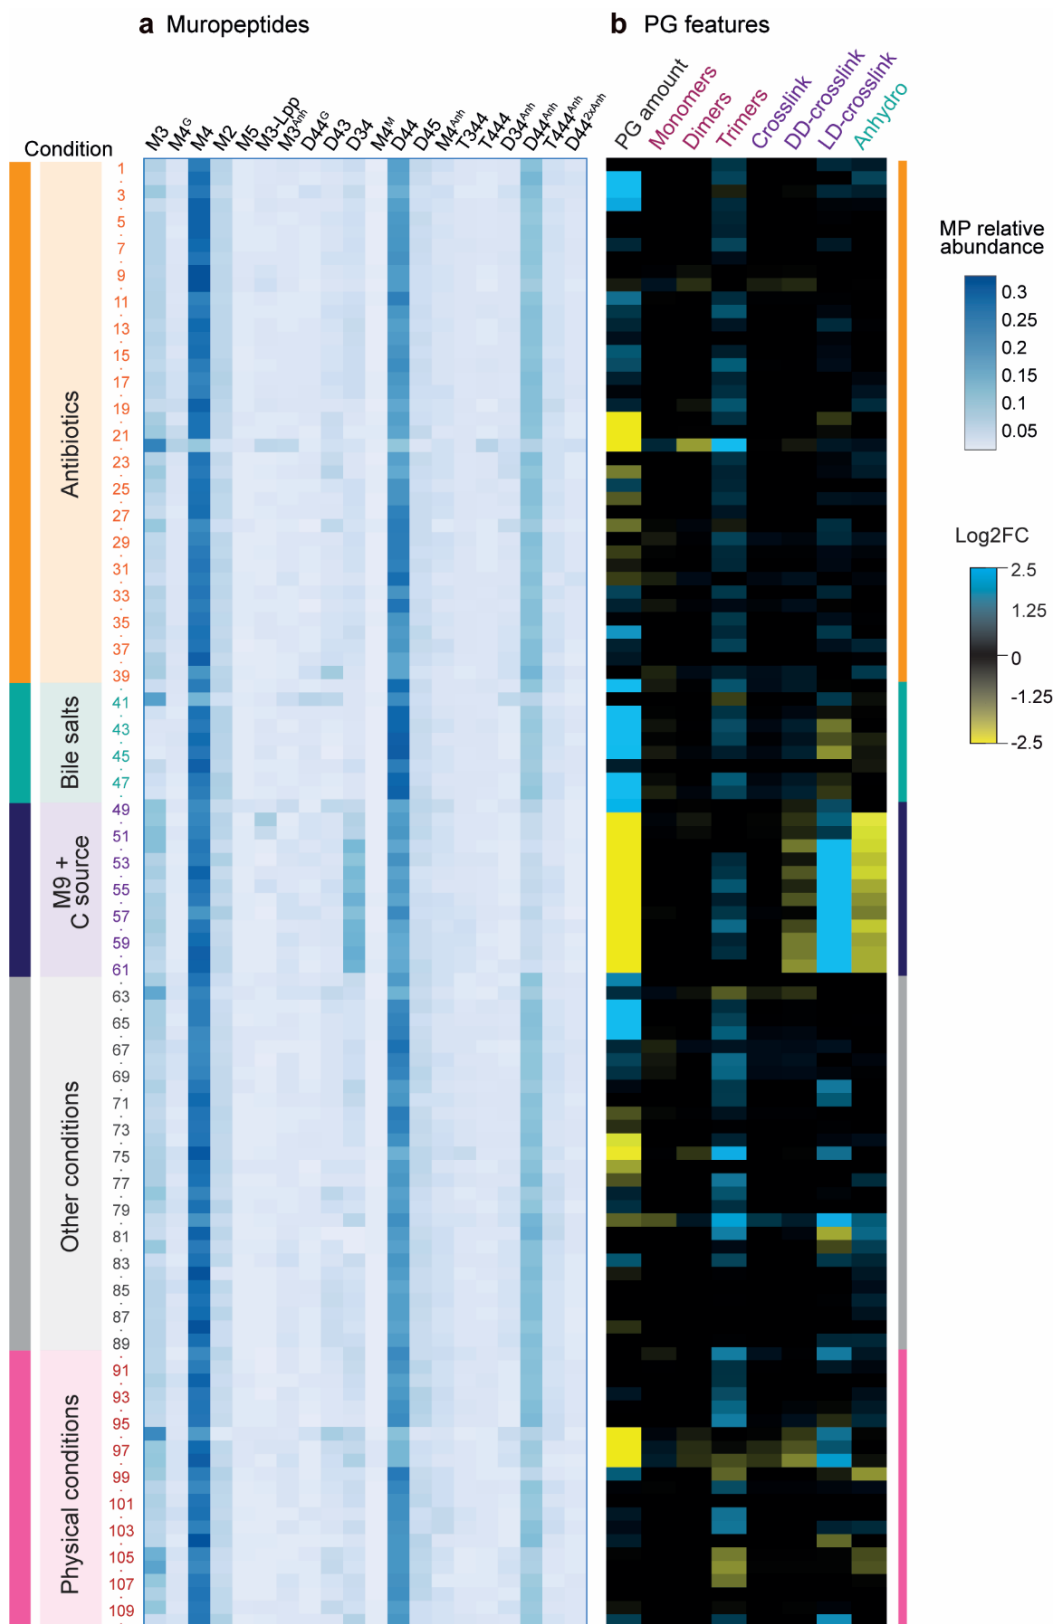

**Supplementary Figure 2. Peptidoglycan analysis of *V. cholerae* grown under different conditions. a.** Heatmap representing the relative abundance of the identified muropeptides

(MP) for all tested conditions (Suppl. Data 1). **b.** Heatmap representing the Log<sub>2</sub>FC calculated for the main peptidoglycan (PG) features. All values are mean of 3 biological replicates. M9+C source: M9 minimal medium supplemented with carbon sources. Details and source data are provided in Supplementary Data 1.

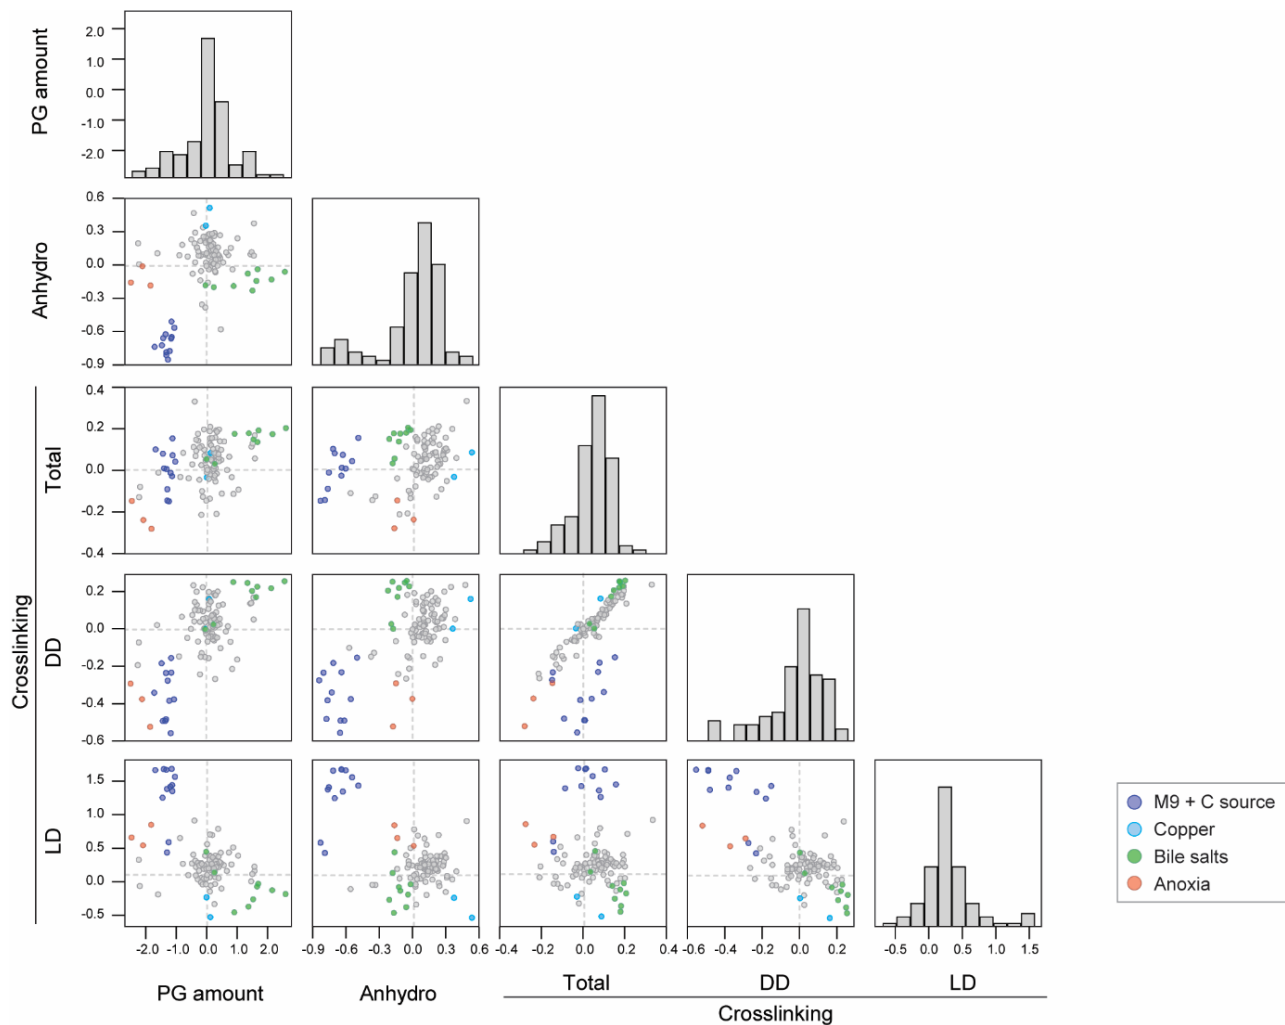

**Supplementary Figure 3. Scatter matrix for the main peptidoglycan features for *V. cholerae* grown under the tested conditions.** Scatter plots representing the Log<sub>2</sub>FC of main peptidoglycan (PG) features: relative PG amount, anhydromuropeptide levels, crosslinking (total and type). Clusters of conditions of interest are highlighted. Values shown in scatter plots are the mean of 3 biological replicates. Histograms showing the distribution of samples for every dimension are represented in the diagonal. Source data are provided in Supplementary Data 1.

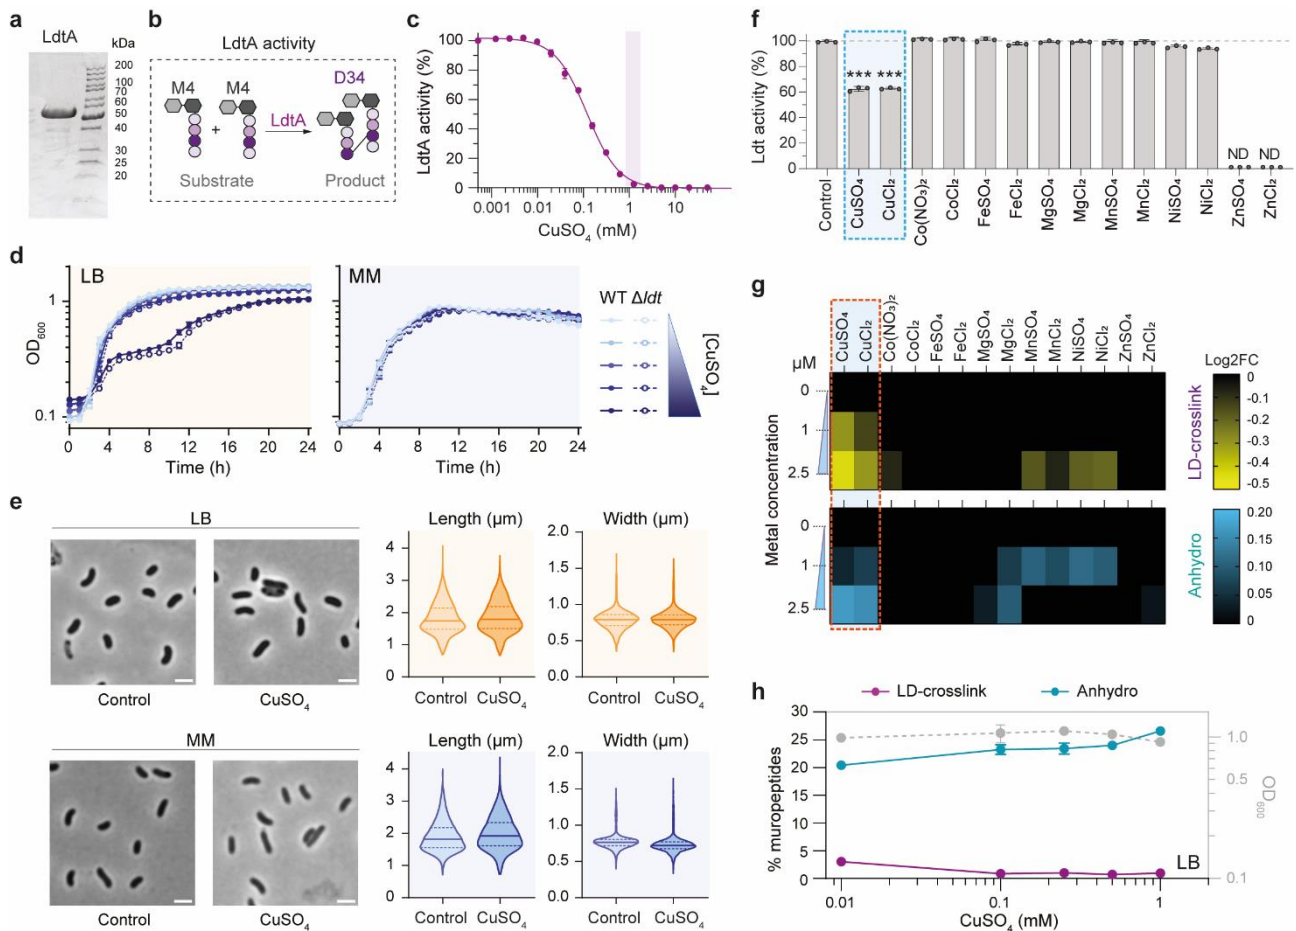

**Supplementary Figure 4. Inhibition of *V. cholerae* LD-transpeptidase by copper.** **a.** Purified LdtA from *V. cholerae*, the LD-transpeptidase which produces LD-crosslinks. The molecular weight of the purified His-tagged protein is predicted to be 58.8 kDa. **b.** Schematic diagram of the LdtA in vitro reaction: LdtA converts M4 monomers into LD-crosslinked D34 dimers. **c.** Relative LdtA activity at different copper concentrations. Working concentration in bacterial cultures in LB is highlighted (1 mM). In vitro assays were performed in triplicate. Data are presented as mean values +/- standard deviation. **d.** Growth of *V. cholerae* WT and  $\Delta ldt$  mutant in LB with 0.5-2 mM  $\text{CuSO}_4$  and MM with 1-10  $\mu\text{M}$   $\text{CuSO}_4$ . Growth curves were performed in triplicate. Data are presented as mean values +/- standard deviation. **e.** Representative phase contrast images and violin plots of the length and mean width of *V. cholerae* WT grown in LB (top) or MM (bottom) in the presence or absence of  $\text{CuSO}_4$  at 1

mM (in LB) or 5  $\mu$ M (in MM). Scale bar: 2  $\mu$ m. Samples size: LB control, n = 6493; LB CuSO<sub>4</sub>, n = 4144; MM control, n = 4724; MM CuSO<sub>4</sub>, n = 3821. **f.** Relative LdtA activity in presence of 0.1 mM of different metal salts. In vitro assays were performed in triplicate. Data are presented as mean values +/- standard deviation. Statistical significance was determined using unpaired t-tests, with an alpha level of 0.05. Two-tailed p values are reported in the Source Data file. ND, not detected; \*\*\*, p <0.001. **g.** Effect of different metal salts on *V. cholerae* PG features in vivo. Heatmaps represent the mean Log<sub>2</sub>FC calculated for LD-crosslink and anhydromuropeptide levels in the PG of *V. cholerae* cultures grown in MM with 1 or 2.5  $\mu$ M of respective metal salt. PG analyses were performed in triplicate. **h.** Concentration-dependent effect of copper on LD-crosslink and anhydromuropeptide levels in the PG of *V. cholerae* grown in LB. Assays were performed in quintuplicate. Data are presented as mean values +/- standard deviation. Source data are provided as a Source Data file.



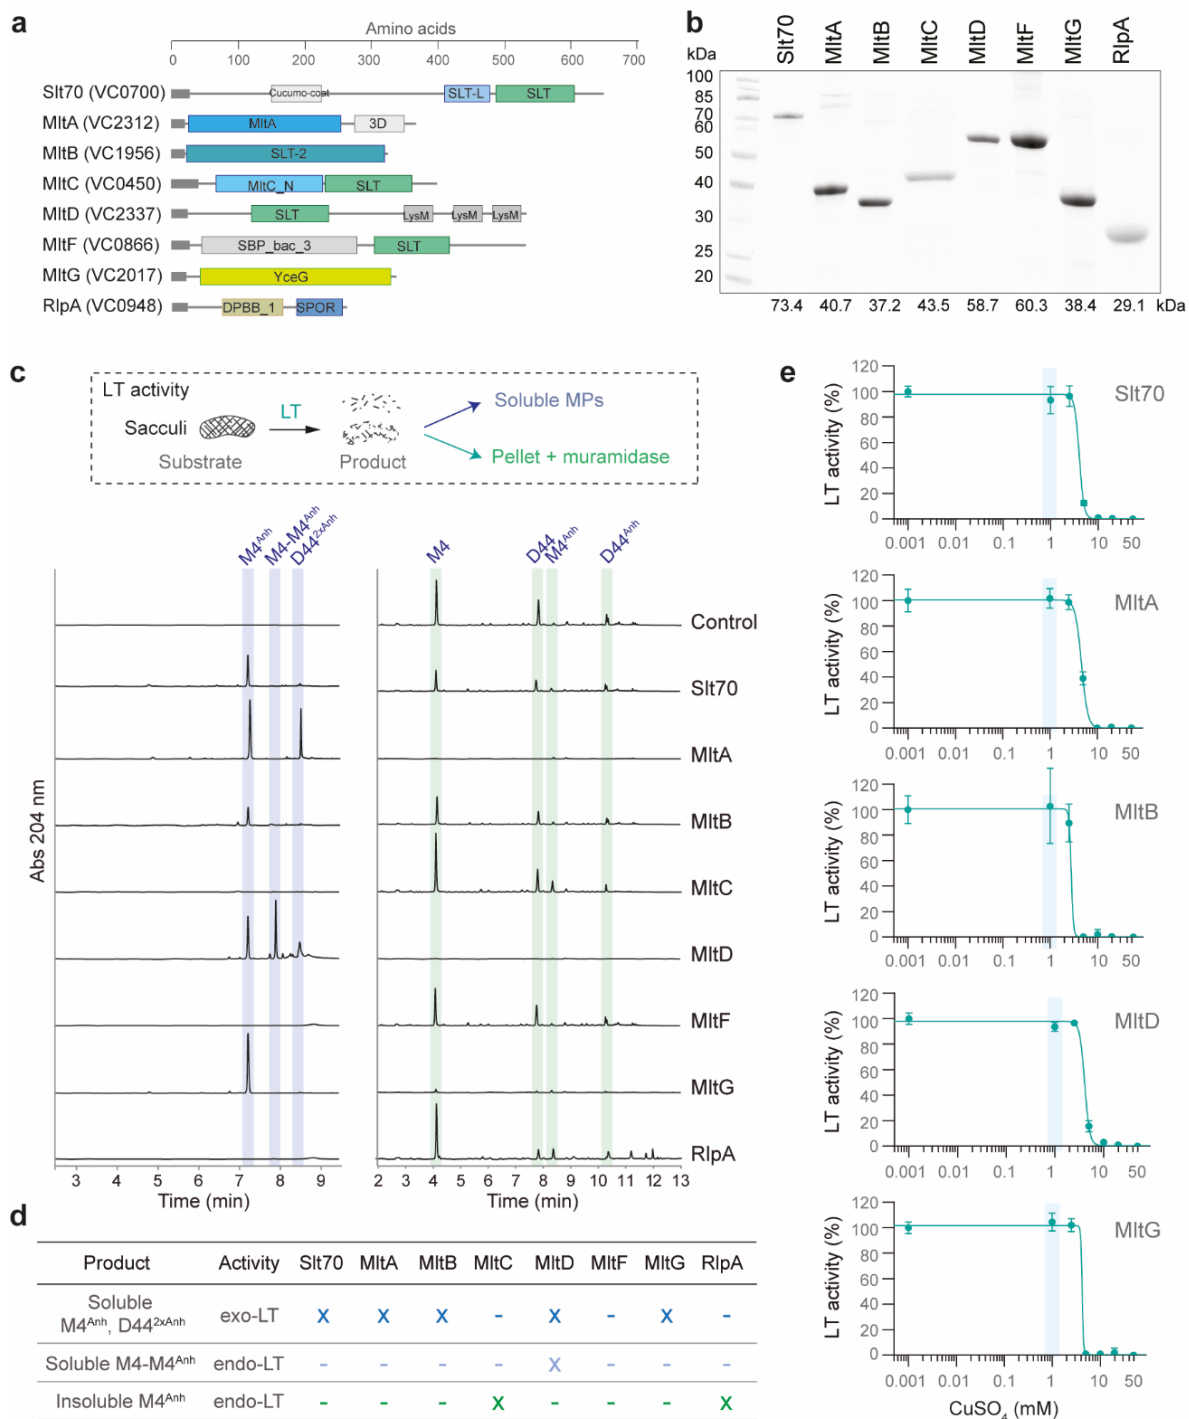

**Supplementary Figure 5. In vitro lytic transglycosylase activity.** **a.** Domain architecture of the lytic transglycosylases (LTs) in *V. cholerae*. **b.** Purified LTs from *V. cholerae*. Predicted molecular weight of the purified His-tagged proteins is indicated at the bottom. **c.** Schematic diagram of in vitro assay used to study the activity of *V. cholerae*'s LTs. Sacculi from *V. cholerae* WT grown in LB was used as substrate. Upon digestion with the LTs, the soluble

products were directly analyzed by LC, and the insoluble pellets were further digested with muramidase prior to LC analysis. Major products are highlighted in the chromatograms. **d.** Summary table of the LT activities of each tested enzyme. **e.** Relative LT activity at different copper concentrations of the LTs. Working concentration in bacterial cultures in LB is highlighted (1 mM). In vitro assays were performed in triplicate. Data are presented as mean values +/- standard deviation. Source data are provided as a Source Data file.

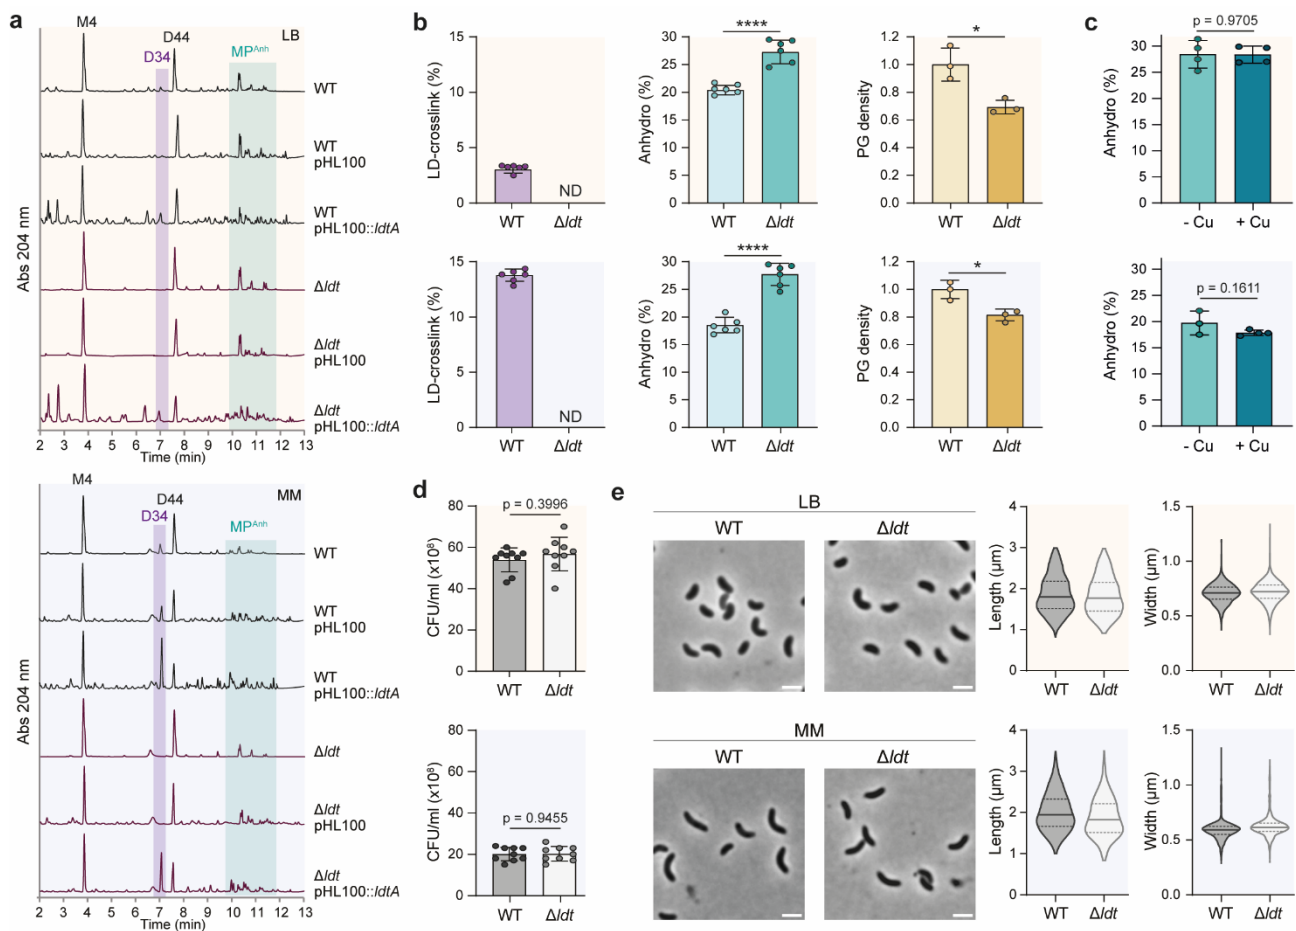

**Supplementary Figure 6. Characterization of the *V. cholerae*  $\Delta$ ldt mutant. a.**

Representative chromatograms obtained from PG of *V. cholerae* WT,  $\Delta$ ldt mutant and complemented strains grown in LB (top) or MM (bottom). LD-crosslinked D34 muropeptide and anhydromuropeptides (MP<sup>Anh</sup>) are indicated. **b.** Relative amount of LD-crosslinked muropeptides, anhydromuropeptides and PG density of *V. cholerae* WT and  $\Delta$ ldt strains grown in LB (top) or MM (bottom). PG analyses were performed in 6 replicates (triplicates for PG density). Data are presented as mean values +/- standard deviation. Statistical significance was determined using unpaired t-tests, with an alpha level of 0.05. Two-tailed p values are reported in the Source Data file. ND, not detected; \*, p < 0.05; \*\*\*\*, p < 0.0001. **c.** Relative amount of anhydromuropeptides in the PG of the *V. cholerae*  $\Delta$ ldt mutant in the presence of CuSO<sub>4</sub> 1 mM CuSO<sub>4</sub> in LB (top) or 5 μM CuSO<sub>4</sub> in MM (bottom). PG analyses

were performed in quadruplicates. Data are presented as mean values +/- standard deviation. Statistical significance was determined using unpaired t-tests, with an alpha level of 0.05. Two-tailed p values are reported. **d.** CFU/ml of *V. cholerae* WT and  $\Delta/dt$  mutant cultures grown overnight in LB (top) or MM (bottom). 9 replicates were analyzed in the viability assays. Data are presented as mean values +/- standard deviation. Statistical significance was determined using unpaired t-tests, with an alpha level of 0.05. Two-tailed p values are reported. **e.** Representative phase contrast images and violin plots of the length and mean width of *V. cholerae* WT and  $\Delta/dt$  mutant cells grown in LB (top) or MM (bottom). Scale bar: 2  $\mu$ m. Samples size: WT LB, n = 1807;  $\Delta/dt$  LB, n = 1630; WT MM, n = 1418;  $\Delta/dt$  MM, n = 1264. Source data are provided as a Source Data file.

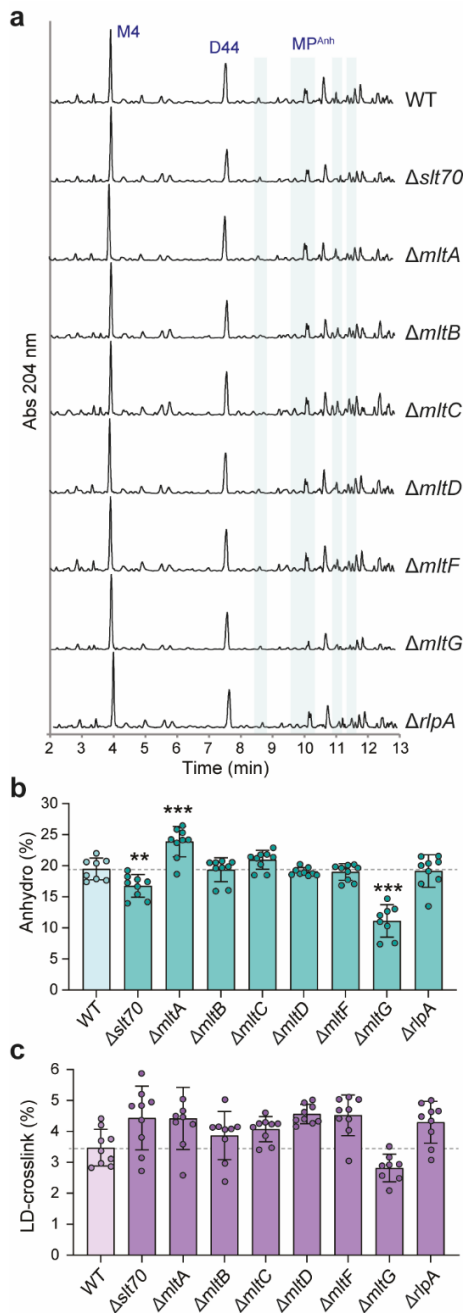

**Supplementary Figure 7. Peptidoglycan analysis of *V. cholerae* lytic transglycosylase mutants.** **a.** Representative chromatograms of the PG of *V. cholerae* WT and  $\Delta$ LT strains grown in LB. Anhydromuropeptides (MP<sup>Anh</sup>) are indicated in green. **b.** Relative amount of anhydromuropeptides in the PG of *V. cholerae* WT and LT mutants grown in LB. **c.** Relative amount of LD-crosslink in the PG of *V. cholerae* WT and  $\Delta$ LT strains grown in LB. PG analyses were performed in 9 replicates. Data are presented as mean values +/- standard deviation. Statistical significance was determined using unpaired t-tests, with an alpha level

of 0.05. Two-tailed p values are reported in the Source Data file. \*\*, p <0.01; \*\*\*, p <0.001.

Source data are provided as a Source Data file.

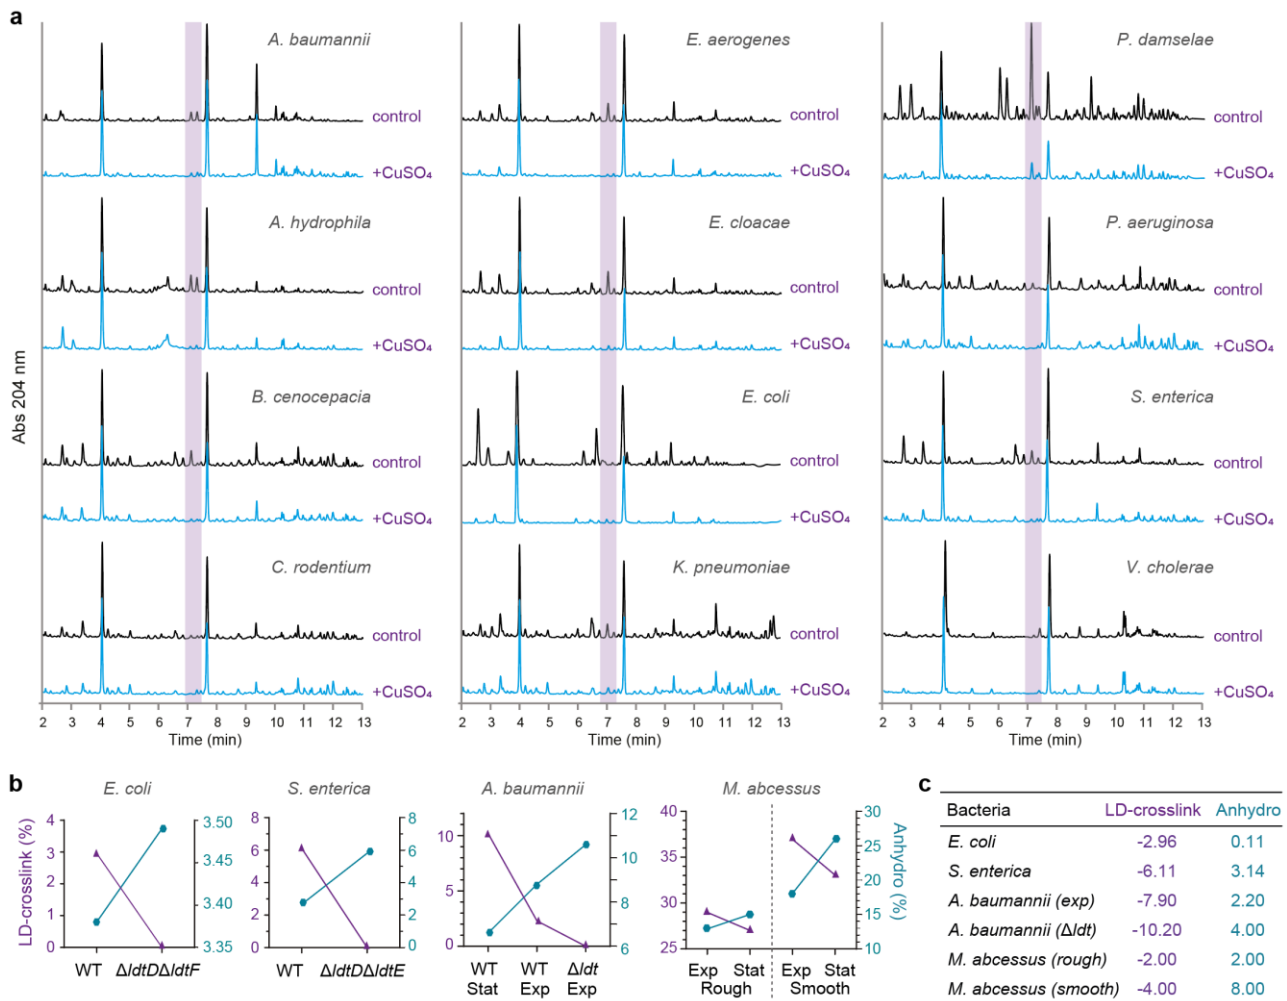

**Supplementary Figure 8. Effect of inhibition of LD-transpeptidases by copper in different bacterial species.** **a.** Representative chromatograms of different bacterial species (*Acinetobacter baumannii*, *Aeromonas hydrophila*, *Burkholderia cenocepacia*, *Citrobacter rodentium*, *Enterobacter aerogenes*, *Enterobacter cloacae*, *Escherichia coli*, *Klebsiella pneumoniae*, *Photobacterium damsela*, *Pseudomonas aeruginosa*, *Salmonella enterica* and *Vibrio cholerae*) grown in absence (control) or presence of 1 mM CuSO<sub>4</sub>. All bacteria were grown in LB, except for *P. damsela* which was grown in TSB. **b.** Inverse correlation between relative amounts of LD-crosslink and anhydromuropeptides observed for different bacteria in the literature<sup>1-4</sup>. Exp, exponential phase; Stat, stationary phase. **c.** Calculated

change in the relative amounts of LD-crosslink and anhydromuropeptides from the data in

**b.** Source data are provided as a Source Data file.



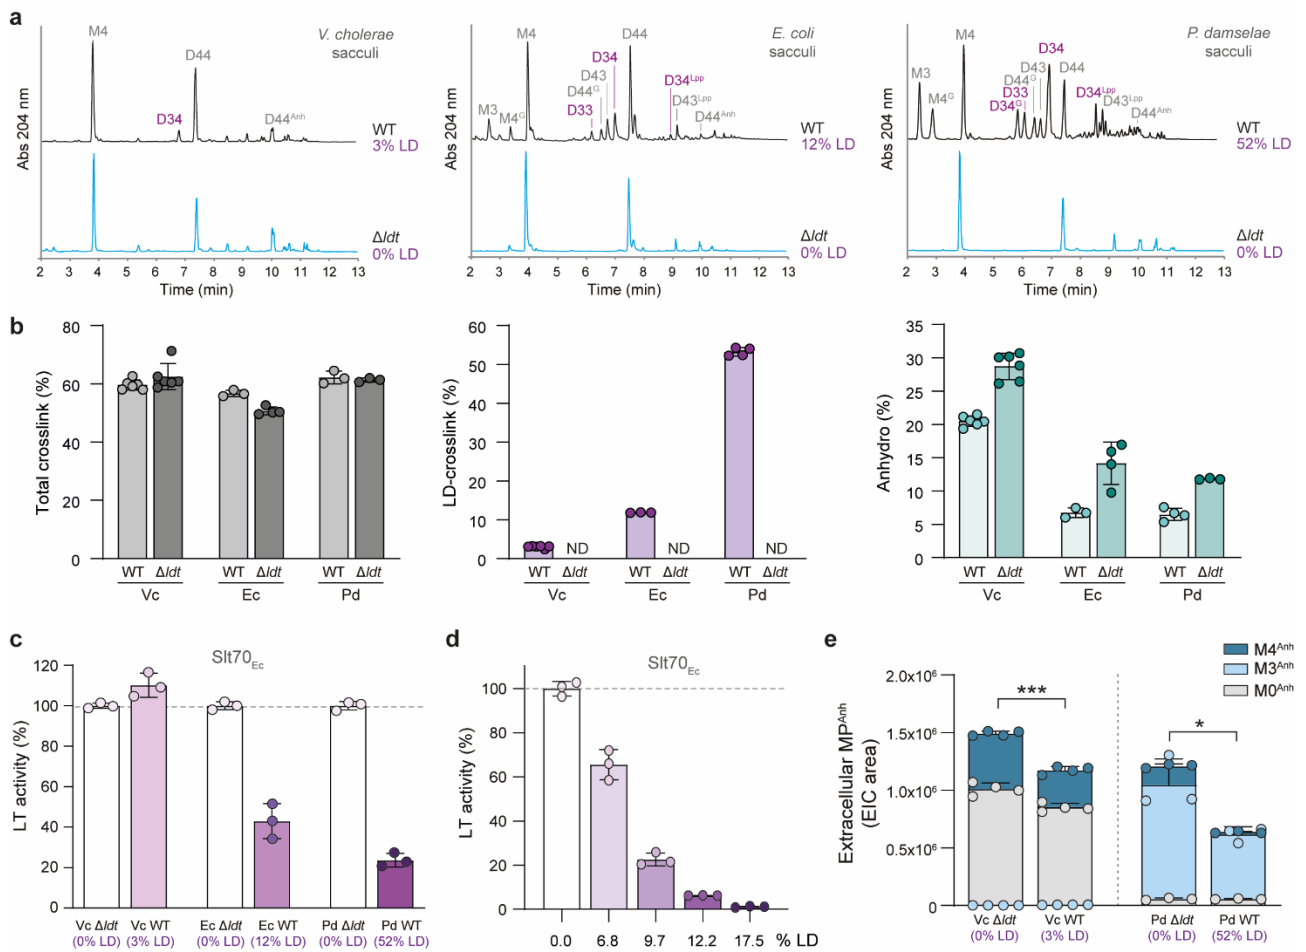

**Supplementary Figure 9. LD-crosslinks inhibit the activity of endogenous lytic transglycosylases.** **a.** Representative chromatograms of *V. cholerae*, *E. coli* and *P. damsela* WT and  $\Delta ldt$  mutant sacculi used in the in vitro reactions to test LT activity. Percentage of LD-crosslinking is indicated. **b.** Relative total crosslink, LD-crosslinking and anhydromuropeptide levels in the WT and  $\Delta ldt$  mutant sacculi used as substrate in the in vitro reactions. PG analyses were performed in 6 replicates for *V. cholerae*, 3-4 replicates for *E. coli*, and 3-4 replicates for *P. damsela*. Data are presented as mean values +/- standard deviation. **c.** Relative LT activity of Slt70 from *E. coli* (Slt70<sub>Ec</sub>) on *V. cholerae* (Vc), *E. coli* (Ec) or *P. damsela* (Pd) WT or  $\Delta ldt$  mutant sacculi. Activity is calculated relative to the  $\Delta ldt$  sacculi substrate, with 0% LD-crosslinks. In vitro assays were performed in triplicates. Data are presented as mean values +/- standard deviation. **d.** Relative LT activity

of Slf70 from *E. coli* on substrate with indicated LD-crosslinking levels. Activity is calculated relative to the sacculi substrate with 0% LD-crosslinks. In vitro assays were performed in triplicates. Data are presented as mean values +/- standard deviation. **e.** Detection of extracellular anhydromuropeptides (product of exo-LT activity) in the growth medium of the *V. cholerae* and *P. damselae* WT and  $\Delta ldt$  strains. Analyses were performed in quadruplicates for *V. cholerae* and triplicates for *P. damselae*. Data are presented as mean values +/- standard deviation. Statistical significance was determined using unpaired t-tests, with an alpha level of 0.05. Two-tailed p values are reported in the Source Data file. \*, p <0.05; \*\*\*, p <0.001. Source data are provided as a Source Data file.

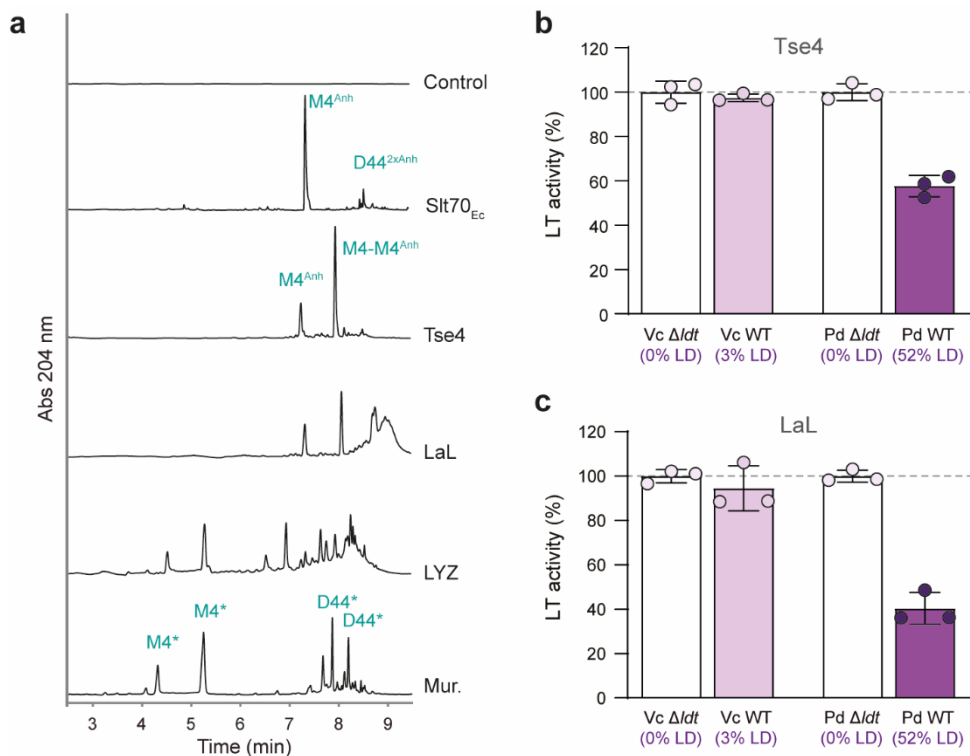

**Supplementary Figure 10. LD-crosslinks inhibit the activity of predatory lytic transglycosylases.** **a.** Representative chromatograms showing the released muropeptides after digestion of *V. cholerae* sacculi with Slit70 from *E. coli* (Slit70<sub>Ec</sub>), Tse4 from *A. baumannii*, bacteriophage lambda endolysin (LaL), chicken egg white lysozyme (LYZ) and mutanolysin from *Streptomyces globisporus* (Mur.). **b.** Relative LT activity of Tse4 on *V. cholerae* or *P. damsela* WT or  $\Delta$ ldt mutant sacculi. Activity is calculated relative to the  $\Delta$ ldt sacculi substrate, with 0% LD-crosslinks. **c.** Relative LT activity of LaL on *V. cholerae* or *P. damsela* WT or  $\Delta$ ldt mutant sacculi. Activity is calculated relative to the  $\Delta$ ldt sacculi substrate, with 0% LD-crosslinks. In vitro assays were performed in triplicates. Data are presented as mean values +/- standard deviation. Source data are provided as a Source Data file.

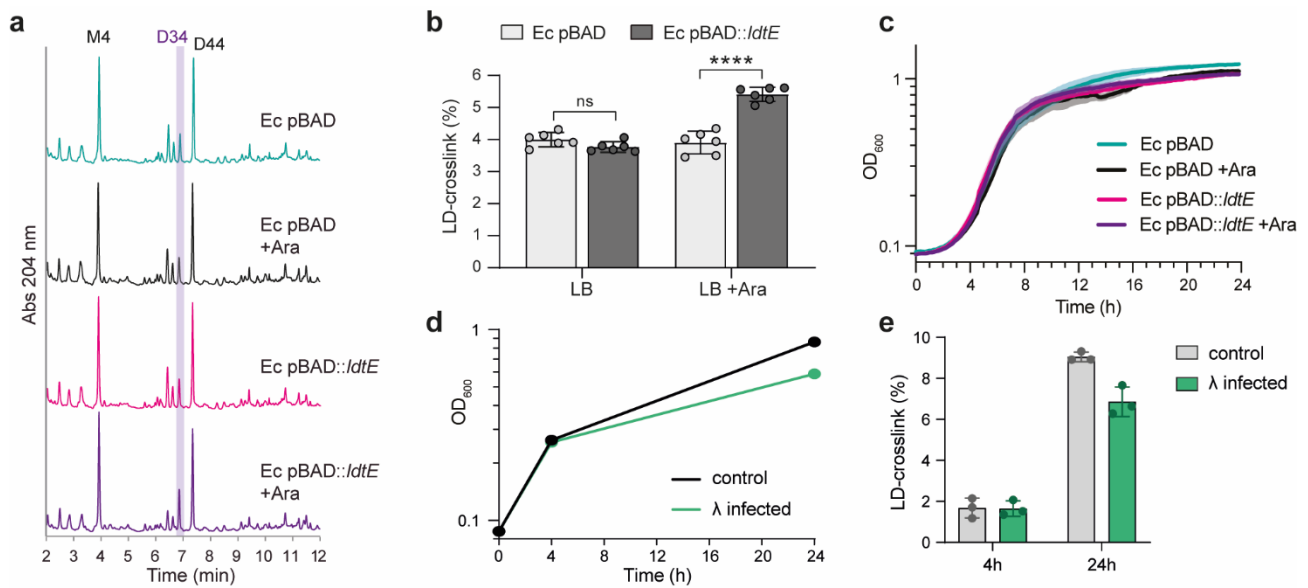

**Supplementary Figure 11. LD-crosslink levels in the peptidoglycan of *E. coli* subjected to phage infections.** **a.** Representative chromatograms obtained from the PG of *E. coli* (Ec) JM109 with empty pBAD or pBAD::ldtE (for overexpression of the LD-transpeptidase LdtE) grown with and without inducer (arabinose 0.2%, +Ara). **b.** Quantification of LD-crosslinking in the PG of *E. coli* JM109 with empty pBAD or pBAD::ldtE, grown with and without inducer. PG analyses were performed in 6 replicates. Data are presented as mean values +/- standard deviation. Statistical significance was determined using unpaired t-tests, with an alpha level of 0.05. Two-tailed p values are reported in the Source Data file. ns: not significant; \*\*\*\*, p < 0.0001. **c.** Growth curves of *E. coli* JM109 with empty pBAD or pBAD::ldtE, grown with and without inducer. Assays were performed in triplicate. Data are presented as mean values +/- standard deviation. **d.** Optical density (OD<sub>600</sub>) of *E. coli* JM109 infected with lambda phage and time points for PG sample collection. Assays were performed in triplicate. Data are presented as mean values +/- standard deviation. **e.** Variation in LD-crosslinking in *E. coli* JM109 infected or not with lambda phage. Assays were performed in triplicate. Data are presented as mean values +/-

standard deviation. Paired t-test results indicate differences are not significant (two-tailed p value = 0.4914). Source data are provided as a Source Data file.

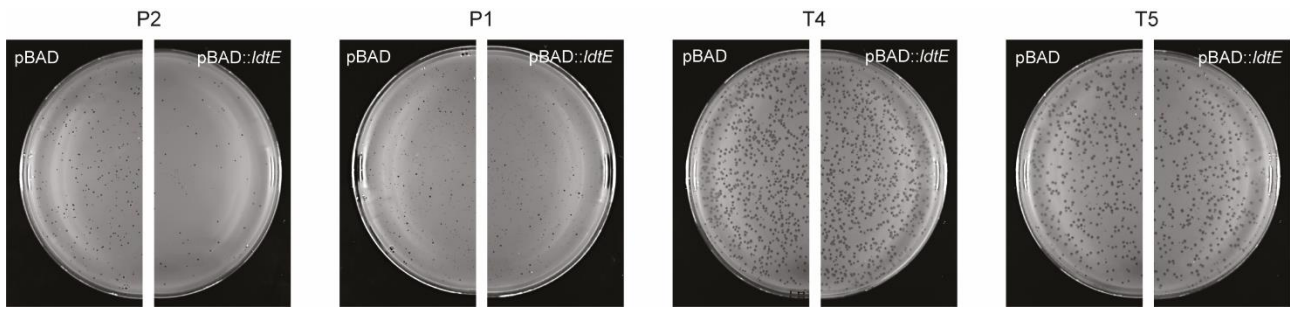

**Supplementary Figure 12. Increased LD-crosslinking specifically provides resistance to LT-encoding phages.** Representative plates showing phage plaque formation upon infection of *E. coli* JM109 carrying empty pBAD or pBAD::*ldtE* with P2 (encoding an LT-like endolysin), P1 and T4 (encoding lysozyme-like endolysins), or T5 (encoding an endopeptidase) phages. LB agar plates are supplemented with 20 µg/ml chloramphenicol, 10 mM MgSO<sub>4</sub>, and 0.2% (w/v) arabinose.

## Supplementary Tables.

### Supplementary Table 1. Bacterial strains.

| Bacteria                                                                                                                            | Media | Temp (° C) | Source/Ref                   |
|-------------------------------------------------------------------------------------------------------------------------------------|-------|------------|------------------------------|
| <i>Vibrio cholerae</i> C6706                                                                                                        | LB    | 37         | 5                            |
| <i>Vibrio cholerae</i> N16961                                                                                                       | LB    | 37         | 6                            |
| <i>Vibrio cholerae</i> N16961 $\Delta$ ldt ( $\Delta$ ldtA $\Delta$ ldtB)                                                           | LB    | 37         | 7                            |
| <i>Vibrio cholerae</i> N16961 $\Delta$ slt70                                                                                        | LB    | 37         | 8                            |
| <i>Vibrio cholerae</i> N16961 $\Delta$ mltA                                                                                         | LB    | 37         | 8                            |
| <i>Vibrio cholerae</i> N16961 $\Delta$ mltB                                                                                         | LB    | 37         | 8                            |
| <i>Vibrio cholerae</i> N16961 $\Delta$ mltC                                                                                         | LB    | 37         | 9                            |
| <i>Vibrio cholerae</i> N16961 $\Delta$ mltD                                                                                         | LB    | 37         | 8                            |
| <i>Vibrio cholerae</i> N16961 $\Delta$ mltF                                                                                         | LB    | 37         | 8                            |
| <i>Vibrio cholerae</i> N16961 $\Delta$ mltG                                                                                         | LB    | 37         | 9                            |
| <i>Vibrio cholerae</i> N16961 $\Delta$ rlpA                                                                                         | LB    | 37         | 9                            |
| <i>Escherichia coli</i> DH5 $\alpha$                                                                                                | LB    | 37         | <i>E. coli</i> genetic stock |
| <i>Escherichia coli</i> BL21                                                                                                        | LB    | 37         | <i>E. coli</i> genetic stock |
| <i>Escherichia coli</i> BW25113                                                                                                     | LB    | 37         | 10                           |
| <i>Escherichia coli</i> BW25113 $\Delta$ ldt ( $\Delta$ ldtA $\Delta$ ldtB $\Delta$ ldtC $\Delta$ ldtD $\Delta$ ldtE $\Delta$ ldtF) | LB    | 37         | 11                           |
| <i>Escherichia coli</i> C600                                                                                                        | LB    | 37         | <i>E. coli</i> genetic stock |
| <i>Escherichia coli</i> JM109                                                                                                       | LB    | 37         | <i>E. coli</i> genetic stock |
| <i>Acinetobacter baumannii</i> ATCC-17978                                                                                           | LB    | 37         | ATCC collection              |
| <i>Aeromonas hydrophila</i> ATCC-7966                                                                                               | LB    | 37         | ATCC collection              |
| <i>Burkholderia cenocepacia</i> K56-2                                                                                               | LB    | 37         | Courtesy of M. Valvano       |
| <i>Citrobacter rodentium</i> ATCC-51116                                                                                             | LB    | 37         | ATCC collection              |
| <i>Enterobacter aerogenes</i> DSM-30053                                                                                             | LB    | 30         | DSMZ collection              |
| <i>Enterobacter cloacae</i> DSM-30054                                                                                               | LB    | 30         | DSMZ collection              |
| <i>Klebsiella pneumoniae</i> MKP103                                                                                                 | LB    | 37         | Courtesy of C. Manoil        |
| <i>Photobacterium damsela</i> CIP102761                                                                                             | TSB   | 30         | Courtesy of B. Gomez-Gil     |
| <i>Photobacterium damsela</i> CIP102761 $\Delta$ ldt ( $\Delta$ ldtA1 $\Delta$ ldtA2 $\Delta$ ldtB)                                 | TSB   | 30         | Alvarez et al, unpublished   |
| <i>Pseudomonas aeruginosa</i> PA14                                                                                                  | LB    | 37         | Courtesy of G. Pier          |
| <i>Salmonella enterica</i> serovar Typhimurium ATCC-14028                                                                           | LB    | 37         | ATCC collection              |

**Supplementary Table 2. Plasmids.**

| Plasmid                   | Description or use                                                                                                                                                            | Source/Ref                   |
|---------------------------|-------------------------------------------------------------------------------------------------------------------------------------------------------------------------------|------------------------------|
| pHL100                    | Plasmid for protein expression in <i>V. cholerae</i> under the control of the P <sub>lac</sub> promoter. KnR.                                                                 | 7                            |
| pHL100:: <i>ldtA</i>      | pHL100 derivative. Expression of LdtA. KnR.                                                                                                                                   | 7                            |
| pET15b                    | Expression vector with T7 promoter and terminator flanking MCS, and optional N-terminal 6xHis-tag sequence. AmpR.                                                             | Novagen                      |
| pET22b                    | Expression vector with T7 promoter and terminator flanking MCS, pelB leader sequence for potential periplasmic localization and optional C-terminal 6xHis-tag sequence. AmpR. | Novagen                      |
| pET28b:: <i>ldtA</i>      | pET28b derivative. Production and purification of LdtA-His protein. KnR.                                                                                                      | 7                            |
| pET28b:: <i>slt70Ec</i>   | pET28b derivative. Production and purification of <i>E. coli</i> 's Slt70-His protein. KnR.                                                                                   | 12                           |
| pET15b:: <i>His-mltA</i>  | pET15b derivative. Production and purification of His-MltA. AmpR.                                                                                                             | This work                    |
| pET15b:: <i>His-mltB</i>  | pET15b derivative. Production and purification of His-MltB. AmpR.                                                                                                             | This work                    |
| pET15b:: <i>His-mltC</i>  | pET15b derivative. Production and purification of His-MltC. AmpR.                                                                                                             | This work                    |
| pET15b:: <i>His-mltD</i>  | pET15b derivative. Production and purification of His-MltD. AmpR.                                                                                                             | This work                    |
| pET15b:: <i>His-mltF</i>  | pET15b derivative. Production and purification of His-MltF. AmpR.                                                                                                             | This work                    |
| pET15b:: <i>His-mltG</i>  | pET15b derivative. Production and purification of His-MltG. AmpR.                                                                                                             | This work                    |
| pET15b:: <i>His-rlpA</i>  | pET15b derivative. Production and purification of His-RlpA. AmpR.                                                                                                             | This work                    |
| pET22b:: <i>slt70-His</i> | pET22b derivative. Production and purification of Slt70-His. AmpR.                                                                                                            | This work                    |
| pET22b:: <i>LaL-His</i>   | Production and purification of LaL-His (lambda lysozyme). AmpR.                                                                                                               | This work                    |
| pBAD33                    | Expression vector with P <sub>BAD</sub> promoter. CmR.                                                                                                                        | 13                           |
| pBAD:: <i>ldtE</i>        | pBAD33 derivative. Overexpression of <i>E. coli</i> 's LDT LdtE. CmR.                                                                                                         | Akbar Espailat, unpublished. |



**Supplementary Table 3. Oligonucleotides.**

| <b>FCP_ID</b> | <b>Name</b>    | <b>Sequence</b>                                     | <b>Description</b>                                                    |
|---------------|----------------|-----------------------------------------------------|-----------------------------------------------------------------------|
| FCP5421       | mltA_Ndel_fw   | <b>aaaaCATATGCAACCTAACG</b><br>ATCGTGCTCAG          | Cloning MltA into pET15b, Δ19 aa in N-terminus, Ndel restriction site |
| FCP5422       | mltA_BamHI_rv1 | <b>aaaaGGATCCCTATTGCTGT</b><br>TTTTCCGGCGG          | Cloning MltA into pET15b, contains Stop codon, BamHI restriction site |
| FCP5424       | mltB_Ndel_fw   | <b>aaaaCATATGAATGAAGTCA</b><br>GTTTTGAACAATATGTCG   | Cloning MltB into pET15b, Δ19 aa in N-terminus, Ndel restriction site |
| FCP5425       | mltB_BamHI_rv1 | <b>aaaaGGATCCTTAGAACGCA</b><br>ATCCGATCCG           | Cloning MltB into pET15b, contains Stop codon, BamHI restriction site |
| FCP5427       | mltC_Ndel_fw   | <b>aaaaCATATGGAATTTATCGA</b><br>GAAATTTACGATGTTGATT | Cloning MltC into pET15b, Δ39 aa in N-terminus, Ndel restriction site |
| FCP5428       | mltC_BamHI_rv1 | <b>aaaaGGATCCTTATCCCGCG</b><br>TTAAATTCCTTCTTAAAT   | Cloning MltC into pET15b, contains Stop codon, BamHI restriction site |
| FCP5430       | mltD_Ndel_fw   | <b>aaaaCATATGACCAATCAG</b><br>ATGACCAAGCG           | Cloning MltD into pET15b, Δ24 aa in N-terminus, Ndel restriction site |
| FCP5431       | mltD_BamHI_rv1 | <b>aaaaGGATCCTTATGCGCTG</b><br>AATTTGGTCACATC       | Cloning MltD into pET15b, contains Stop codon, BamHI restriction site |
| FCP5433       | mltF_XhoI_fw1  | <b>aaaaCTCGAGGATTCCGAGC</b><br>CCAAAAGCG            | Cloning MltF into pET15b, Δ27 aa in N-terminus, XhoI restriction site |
| FCP5434       | mltF_BamHI_rv1 | <b>aaaaGGATCCCTAATTTTTGC</b><br>TCTCAGTGGATGG       | Cloning MltF into pET15b, contains Stop codon, BamHI restriction site |
| FCP5437       | mltG_Ndel_fw   | <b>aaaaCATATGTATGTTGTTAA</b><br>GCAGATGGATCAGTA     | Cloning MltG into pET15b, Δ21 aa in N-terminus, Ndel restriction site |

| FCP_ID  | Name           | Sequence                                             | Description                                                           |
|---------|----------------|------------------------------------------------------|-----------------------------------------------------------------------|
| FCP5438 | mltG_XhoI_rv1  | <b>aaaaCTCGAGTCATTGTTTTG</b><br>TTCTAAGTTTTTTGAGATAA | Cloning MltG into pET15b, contains Stop codon, XhoI restriction site  |
| FCP5440 | rlpA_NdeI_fw   | <b>aaaaCATATGTATGATATGTC</b><br>TGACGATCAAGCAC       | Cloning RlpA into pET15b, Δ23 aa in N-terminus, NdeI restriction site |
| FCP5441 | rlpA_BamHI_rv1 | <b>aaaaGGATCCTCATTTAGCA</b><br>CGTTTATTAATCGTCTT     | Cloning RlpA into pET15b, contains Stop codon, BamHI restriction site |
| FCP5710 | slt_NdeI_fw2   | <b>aaaaCATATGACGCGCCTGA</b><br>CGGTATTTAAGC          | Cloning Slt70 into pET22b, from Start codon, NdeI restriction site    |
| FCP5420 | slt_BamHI_rv2  | <b>aaaaGGATCCGAATACTTTG</b><br>TATTTAACTCATGCTCATT   | Cloning Slt70 into pET22b, no Stop codon, BamHI restriction site      |
| FCP5849 | LAL_NdeI_fw    | <b>aaaaCATATGGTAGAAATCA</b><br>ATAATCAACGTAAGGC      | Cloning LaL into pET22b, from Start codon, NdeI restriction site      |
| FCP5850 | LAL_BamHI_rv   | <b>aaaaGGATCCGATACATCAA</b><br>TCTCTCTGACCGTTCC      | Cloning LaL into pET22b, no Stop codon, BamHI restriction site        |

**Supplementary Table 4. List of phage genomes and endolysins.**

| <b>Phage</b> | <b>ICTV family</b>    | <b>Genome<sup>a</sup></b> | <b>Endolysin<sup>b</sup></b> | <b>UniProt, CDD domain</b> |
|--------------|-----------------------|---------------------------|------------------------------|----------------------------|
| Lambda       | <i>Siphoviridae</i>   | NC_001416                 | NP_040645.1                  | lambda_lys-like            |
| P2           | <i>Myoviridae</i>     | NC_001895.1               | NP_046765.1                  | lambda_lys-like            |
| P1           | <i>Myoviridae</i>     | NC_005856.1               | YP_006484.1                  | lyz_P1                     |
| T4           | <i>Myoviridae</i>     | NC_000866.4               | NP_049736.1                  | T4-like_lys                |
| T5           | <i>Demerecviridae</i> | NC_005859.1               | YP_006868.1                  | L-Ala-D-Glu_peptidase_like |

<sup>a</sup> GenBank nucleotide accession number

<sup>b</sup> GenBank protein accession number

## Supplementary References

- 1 Hernandez, S. B., Cava, F., Pucciarelli, M. G., Garcia-Del Portillo, F., de Pedro, M. A. & Casadesus, J. Bile-induced peptidoglycan remodelling in *Salmonella enterica*. *Environmental microbiology* **17**, 1081-1089 (2015). <https://doi.org/10.1111/1462-2920.12491>
- 2 Kang, K. N. *et al.* Septal Class A Penicillin-Binding Protein Activity and Id-Transpeptidases Mediate Selection of Colistin-Resistant Lipooligosaccharide-Deficient *Acinetobacter baumannii*. *mBio* **12** (2021). <https://doi.org/10.1128/mBio.02185-20>
- 3 Lavollay, M. *et al.* The peptidoglycan of *Mycobacterium abscessus* is predominantly cross-linked by L,D-transpeptidases. *J Bacteriol* **193**, 778-782 (2011). <https://doi.org/10.1128/JB.00606-10>
- 4 More, N. *et al.* Peptidoglycan Remodeling Enables *Escherichia coli* To Survive Severe Outer Membrane Assembly Defect. *mBio* **10** (2019). <https://doi.org/10.1128/mBio.02729-18>
- 5 Thelin, K. H. & Taylor, R. K. Toxin-coregulated pilus, but not mannose-sensitive hemagglutinin, is required for colonization by *Vibrio cholerae* O1 El Tor biotype and O139 strains. *Infect Immun* **64**, 2853-2856 (1996). <https://doi.org/10.1128/iai.64.7.2853-2856.1996>
- 6 Heidelberg, J. F. *et al.* DNA sequence of both chromosomes of the cholera pathogen *Vibrio cholerae*. *Nature* **406**, 477-483 (2000). <https://doi.org/10.1038/35020000>
- 7 Cava, F., de Pedro, M. A., Lam, H., Davis, B. M. & Waldor, M. K. Distinct pathways for modification of the bacterial cell wall by non-canonical D-amino acids. *EMBO J* **30**, 3442-3453 (2011). <https://doi.org/10.1038/emboj.2011.246>
- 8 Weaver, A. I. *et al.* Lytic transglycosylases mitigate periplasmic crowding by degrading soluble cell wall turnover products. *eLife* **11** (2022). <https://doi.org/10.7554/eLife.73178>
- 9 Weaver, A. I., Jimenez-Ruiz, V., Tallavajhala, S. R., Ransegnola, B. P., Wong, K. Q. & Dorr, T. Lytic transglycosylases RlpA and MltC assist in *Vibrio cholerae* daughter cell separation. *Mol Microbiol* **112**, 1100-1115 (2019). <https://doi.org/10.1111/mmi.14349>
- 10 Datsenko, K. A. & Wanner, B. L. One-step inactivation of chromosomal genes in *Escherichia coli* K-12 using PCR products. *Proceedings of the National Academy of Sciences of the United States of America* **97**, 6640-6645 (2000). <https://doi.org/10.1073/pnas.120163297>
- 11 Kuru, E. *et al.* Fluorescent D-amino-acids reveal bi-cellular cell wall modifications important for *Bdellovibrio bacteriovorus* predation. *Nature microbiology* **2**, 1648-1657 (2017). <https://doi.org/10.1038/s41564-017-0029-y>
- 12 Espallat, A. *et al.* Chemometric Analysis of Bacterial Peptidoglycan Reveals Atypical Modifications That Empower the Cell Wall against Predatory Enzymes and Fly Innate Immunity. *J Am Chem Soc* **138**, 9193-9204 (2016). <https://doi.org/10.1021/jacs.6b04430>
- 13 Guzman, L. M., Belin, D., Carson, M. J. & Beckwith, J. Tight regulation, modulation, and high-level expression by vectors containing the arabinose PBAD promoter. *J Bacteriol* **177**, 4121-4130 (1995). <https://doi.org/10.1128/jb.177.14.4121-4130.1995>
