# Supplementary material for: Control of bacterial cell wall autolysins by peptidoglycan crosslinking mode
Source: PubMed Central journal article supplement (PMC11390936; doi:10.1038/s41467-024-52325-2), 2024-09-11
Supplement: 41467_2024_52325_MOESM3_ESM.pdf [file 41467_2024_52325_MOESM3_ESM.pdf]

## Description of Additional Supplementary Files

**File Name: Supplementary Data 1.**

**Description: PG analysis of the bacterial pathogen *Vibrio cholerae* across different conditions.** The file includes the list of conditions used in the screening; a description of the analyzed PG features; the relative amount, fold change and log<sub>2</sub> fold change (Log<sub>2</sub>FC) values for the PG features and identified muropeptides.
